# Supplementary material for: Gut-Microbiome Composition in Response to Phenylketonuria Depends on Dietary Phenylalanine in BTBR Pahenu2 Mice
Source: Front Nutr. 2022 Jan 4;8:735366. doi: 10.3389/fnut.2021.735366 (PMC8763796; doi:10.3389/fnut.2021.735366)
Supplement: Supplementary Table 3 — BaseMean of bacterial families and genera per diet and correlation analyses Phe-levels and behavior. [file Table_3.XLSX]

## Sheet: Table 1.
		Supplemental Table 3. BaseMean of bacterial families and genera per diet and correlation analyses Phe-levels and behavior
		Abundance - Six Weeks Diet													Abundance - Ten Weeks Diet													Correlation Analyses - Six Weeks Diet													Correlation Analyses - Ten Weeks Diet
		WT High Phe			Phe-restricted			Semi Phe			PKU High Phe				WT High Phe			Phe-restricted			Semi Phe			PKU High Phe				Open Field			Novel Object R.			Spatial Object R.			Balance Beam				Phe-levels			Open Field			Novel Object R.
	Phylum Level	Mean		SEM	Mean		SEM	Mean		SEM	Mean		SEM		Mean		SEM	Mean		SEM	Mean		SEM	Mean		SEM		R-value	P-value	FDR	R-value	P-value	FDR	R-value	P-value	FDR	R-value	P-value	FDR		R-value	P-value	FDR	R-value	P-value	FDR	R-value	P-value	FDR
	Actinobacteria	14.0926	±	1.42737	18.5981	±	1.10576	13.8811	±	1.58258	32.8089	±	1.67342		30.9623	±	2.26713	57.4323	±	1.97873	14.0152	±	0.807492	58.716	±	4.30735		No significant difference in abundance after six weeks of diet													-0.293615	0.0735871	0.147174	0.194763	0.277421	0.277421	-0.337775	0.0631103	0.126221
	Firmicutes	2270.91	±	7.87285	1177.1	±	3.89007	1377.53	±	6.84092	3007.13	±	15.2665		2218.61	±	6.00581	1949.15	±	6.6145	1790.88	±	7.39882	1978.91	±	5.31732		-0.0882353	0.613019	0.613019	-0.0289589	0.87502	0.87502	-0.0905451	0.632987	0.632987	-0.0520752	0.784628	0.784628		No significant difference in abundance after ten weeks of diet
	Tenericutes	1.8338	±	0.500493	2.7649	±	0.843685	3.01824	±	1.06531	2.25508	±	0.697971		1.53509	±	0.600472	5.46262	±	1.61836	0.193976	±	0.235425	5.14307	±	1.38011		No significant difference in abundance after six weeks of diet													0.0288754	0.869212	0.869212	-0.203595	0.25578	0.277421	0.00322517	0.986262	0.986262
	Family Level
	Coriobacteriaceae	11.2398	±	1.24923	16.0405	±	0.965555	8.11036	±	0.913036	28.9665	±	1.61511		20.9294	±	2.45013	62.1867	±	3.54096	8.6079	±	0.605492	33.2587	±	2.29014		No significant difference in abundance after six weeks of diet													-0.424553	0.00789133	0.0176381	0.218067	0.222792	0.445584	-0.32193	0.0773735	0.23212
	Desulfovibrionaceae	9.10559	±	0.82753	11.8313	±	1.54646	8.40986	±	0.800099	9.66557	±	1.80472		24.2417	±	1.63229	29.2776	±	1.80284	13.8505	±	0.694702	8.23078	±	0.761697		No significant difference in abundance after six weeks of diet													-0.426215	0.00762596	0.0176381	0.288275	0.103756	0.435657	0.0683314	0.714928	0.833369
	Enterobacteriaceae	101.089	±	6.03231	20.4054	±	3.15082	22.9931	±	2.57814	33.8215	±	1.85729		91.3662	±	3.9179	13.2555	±	1.66066	40.3051	±	3.3871	155.852	±	7.78235		No significant difference in abundance after six weeks of diet													0.195692	0.24574	0.24574	0.0930779	0.606416	0.909624	-0.03939	0.833369	0.833369
	Enterococcaceae	37.6308	±	2.6345	3.85007	±	0.566592	22.4758	±	2.53033	27.6664	±	2.67717		51.07	±	3.50051	33.3239	±	2.65951	74.5162	±	3.65345	377.469	±	7.92628		0.0200003	0.909208	0.909208	0.187802	0.30334	0.404453	0.373133	0.0422647	0.169059	-0.15179	0.423296	0.846592		0.381659	0.0180596	0.0270894	0.0523142	0.77248	0.926976	0.133388	0.474386	0.711578
	Erysipelotrichaceae	748.961	±	8.44968	338.184	±	5.03718	281.104	±	4.87294	1685.46	±	10.9433		310.026	±	6.01961	914.6	±	16.4834	405.909	±	6.15934	1935.45	±	18.7266		-0.0754955	0.666445	0.909208	-0.255705	0.157789	0.322838	-0.1088	0.567117	0.620083	-0.0291565	0.878443	0.878443		0.286793	0.0811027	0.0973232	-0.259024	0.145219	0.435657	-0.422984	0.0185195	0.111117
	Peptostreptococcaceae	83.6988	±	2.86678	6.1024	±	0.985251	73.0278	±	6.52949	12.4643	±	0.666201		148.457	±	5.12494	31.4361	±	3.98725	101.153	±	3.362	88.769	±	3.7247		0.0344345	0.844315	0.909208	-0.0327691	0.85869	0.85869	0.0943132	0.620083	0.620083	0.155266	0.412627	0.846592		No significant difference in abundance after ten weeks of diet
	Porphyromonadaceae	880.174	±	3.43401	1323.51	±	4.78358	830.916	±	3.42379	896.725	±	3.14817		655.719	±	2.01792	1672.36	±	12.4677	709.834	±	3.6212	535.618	±	3.05398		No significant difference in abundance after six weeks of diet													-0.427454	0.00881904	0.0176381	0.00467914	0.980001	0.980001	0.209677	0.256463	0.512927
	Streptococcaceae	31.0419	±	3.30257	1.64055	±	0.822709	2.75259	±	1.06319	1.19245	±	0.318058		58.9946	±	3.43929	8.88032	±	2.18039	7.57375	±	1.90583	21.1253	±	3.62746		0.233867	0.176321	0.705286	0.253564	0.161419	0.322838	0.251964	0.179202	0.358405	0.0407933	0.830525	0.878443		No significant difference in abundance after ten weeks of diet
	Genus Level
	Acetatifactor	26.5361	±	1.12052	4.21548	±	0.766975	11.1976	±	0.815334	30.2221	±	2.55565		56.8491	±	2.97452	5.82537	±	0.690469	10.6468	±	0.61632	31.0344	±	2.09189		-0.169777	0.32954	0.797134	0.123278	0.501462	0.668616	-0.0423493	0.824158	0.861905	0.111371	0.557934	0.940286		0.373464	0.022798	0.0531953	-0.0712014	0.693765	0.971897	0.160332	0.388907	0.782721
	Alloprevotella	15.3701	±	0.991289	34.0544	±	1.77005	44.6881	±	2.25155	112.271	±	6.00151		5.88896	±	0.469956	54.41	±	5.59418	8.44312	±	0.796873	16.1536	±	1.57798		0.147261	0.398567	0.797134	-0.618559	0.000161047	0.00193257	0.104853	0.581343	0.7441	0.0399733	0.833884	0.940286		-0.185403	0.271936	0.317259	0.0378338	0.834422	0.971897	-0.0553593	0.767392	0.829567
	Clostridium XlVb	15.9213	±	0.542886	48.707	±	3.96336	19.2947	±	1.13281	12.4083	±	0.667684		16.3601	±	1.07479	11.7672	±	0.520969	22.3632	±	0.779302	17.4967	±	0.869623		0.121988	0.485118	0.831631	-0.146172	0.424709	0.637063	-0.310191	0.0952699	0.487352	-0.183447	0.331869	0.940286		No significant difference in abundance after six weeks of diet
	Clostridium XVIII	171.169	±	7.64599	15.9356	±	1.79054	49.0836	±	3.29042	171.36	±	8.28686		7.49071	±	1.08244	22.0951	±	2.67621	9.59422	±	1.47486	2.82768	±	0.610239		No significant difference in abundance after six weeks of diet													-0.1662	0.31864	0.343151	-0.0507851	0.778963	0.971897	-0.257544	0.161889	0.755483
	Enterococcus	35.7128	±	2.59747	4.1406	±	0.615584	22.4388	±	2.44479	33.4242	±	3.6672		36.0049	±	2.04934	33.1606	±	2.7483	74.4044	±	3.80448	371.867	±	8.08775		0.0200003	0.909208	0.909208	0.187802	0.30334	0.637063	0.373133	0.0422647	0.487352	-0.15179	0.423296	0.940286		0.383414	0.017493	0.0489803	0.0546616	0.762556	0.971897	0.135412	0.467644	0.814482
	Enterorhabdus	4.51133	±	0.359846	12.1394	±	0.920758	5.38937	±	0.678456	6.8327	±	0.383398		6.94799	±	0.573617	38.7796	±	2.10177	6.47223	±	0.666453	11.0616	±	1.56552		0.0400254	0.819424	0.909208	-0.0750211	0.683219	0.74533	-0.196854	0.297113	0.71307	-0.152044	0.422513	0.940286		-0.561981	0.000295068	0.00206548	0.19923	0.266332	0.971897	-0.165388	0.373925	0.782721
	Escherichia/Shigella	94.8277	±	5.98871	16.5888	±	2.49518	62.2099	±	5.61412	33.509	±	1.77948		82.6996	±	3.61565	13.134	±	1.81602	36.8119	±	3.24063	171.158	±	8.55214		No significant difference in abundance after six weeks of diet													0.189175	0.262128	0.317259	0.162979	0.364818	0.971897	-0.0584431	0.754818	0.829567
	Intestinimonas	4.79573	±	0.635532	4.28266	±	0.730714	3.92956	±	0.343336	4.05046	±	0.40682		5.09004	±	0.516275	9.00094	±	1.03643	5.60527	±	0.632606	2.03234	±	0.480483		No significant difference in abundance after six weeks of diet													-0.421024	0.0105551	0.0369427	0.0905988	0.616078	0.971897	0.102891	0.581773	0.814482
	Lactococcus	8.29052	±	1.5843	0.0698734	±	0.264336	0.52492	±	0.416005	5.97831	±	2.08334		62.7545	±	4.85739	0.902617	±	0.814662	1.47361	±	0.539086	16.7131	±	3.27901		0.20943	0.227259	0.797134	-0.0840588	0.647383	0.74533	-0.131938	0.487057	0.7441	-0.0284864	0.881217	0.940286		0.290523	0.0768158	0.134428	-0.0221832	0.902476	0.971897	-0.105001	0.57401	0.814482
	Olsenella	4.81417	±	1.39918	1.48322	±	1.0308	0.659061	±	0.463993	21.9769	±	1.96238		0.138919	±	0.265472	11.3611	±	2.22426	0.569633	±	0.485974	8.84741	±	2.48124		-0.158955	0.361738	0.797134	-0.165877	0.364239	0.637063	0.261683	0.162451	0.487352	0.0142829	0.940286	0.940286		-0.152395	0.367887	0.367887	-0.124108	0.491375	0.971897	-0.334745	0.0656656	0.459659
	Oscillibacter	35.559	±	1.12639	11.8796	±	0.969229	23.6775	±	0.769267	25.8474	±	1.23731		28.5873	±	1.07232	18.1499	±	1.27749	20.0868	±	1.00454	20.194	±	0.982211		-0.0703795	0.692459	0.909208	0.152293	0.41343	0.637063	-0.273064	0.151796	0.487352	-0.0687231	0.72317	0.940286		No significant difference in abundance after ten weeks of diet
	Parabacteroides	24.0403	±	1.79126	212.875	±	5.22578	30.4871	±	1.10773	35.5218	±	2.20107		18.5329	±	1.70012	164.459	±	3.24157	23.5366	±	1.30331	60.385	±	4.38617		0.213565	0.218003	0.797134	-0.152929	0.403373	0.637063	-0.033159	0.861905	0.861905	0.200022	0.289249	0.940286		-0.565594	0.00021524	0.00206548	0.0976998	0.588577	0.971897	0.0345176	0.853745	0.853745
	Rikenella	54.8113	±	1.71629	42.4263	±	2.23499	62.9821	±	2.07327	53.3181	±	2.54783		118.591	±	3.22429	7.85832	±	1.43074	38.6057	±	2.67018	51.2363	±	4.01965		No significant difference in abundance after six weeks of treatment													0.276309	0.0931025	0.144826	-0.0317277	0.860861	0.971897	0.0546452	0.770312	0.829567
	Romboutsia	78.0684	±	2.76279	6.86439	±	1.18468	71.587	±	6.47693	11.3448	±	0.482514		122.511	±	4.39261	33.3456	±	4.20139	93.3822	±	3.00077	100.369	±	4.52386		0.0344345	0.844315	0.909208	-0.0327691	0.85869	0.85869	0.0943132	0.620083	0.7441	0.155266	0.412627	0.940286		No significant difference in abundance after ten weeks of diet
	unclassified_Desulfovibrionaceae	3.2517	±	0.723732	6.43749	±	1.53708	5.07749	±	0.868744	0.344675	±	0.395534		10.096	±	0.925946	12.3625	±	2.03227	5.15173	±	0.487365	0.996431	±	0.356391		0.293711	0.0868017	0.797134	-0.2214	0.223307	0.637063	-0.164782	0.384208	0.7441	0.107822	0.570625	0.940286		-0.325294	0.0494636	0.0989271	0.176679	0.325325	0.971897	0.159515	0.39136	0.782721
	unclassified_Erysipelotrichaceae	545.292	±	9.4547	279.091	±	4.36626	203.757	±	4.41807	1662.97	±	13.8995		244.952	±	7.03103	838.417	±	18.2123	329.1	±	6.33936	1798.51	±	17.052		-0.065971	0.706526	0.909208	-0.242669	0.18023	0.637063	-0.114127	0.546682	0.7441	-0.0389451	0.8381	0.940286		0.256074	0.120707	0.168989	-0.214274	0.231144	0.971897	-0.424884	0.0171919	0.240687
	unclassified_Porphyromonadaceae	555.8	±	3.73598	740.729	±	3.11571	381.892	±	3.1122	541.623	±	6.54449		406.876	±	3.71516	1386.5	±	15.2595	425.172	±	3.31383	1167.94	±	25.8989		No significant difference in abundance after six weeks of diet													-0.458538	0.00431363	0.0201303	-0.000668449	0.997778	0.997778	0.199194	0.28143	0.782721
[truncated: 6 more columns]
